# DRAFT MANUSCRIPT

Title: Use of viral load to improve survey estimates of known HIV-positive status and antiretroviral treatment coverage

Running head: Adjusting survey estimates with viral load

Peter W. YOUNG<sup>1,§</sup>, Emily ZIELINSKI-GUTIERREZ<sup>1</sup>, Joyce WAMICWE<sup>2</sup>, Irene MUKUI<sup>2</sup>,  
Andrea A. KIM<sup>3</sup>, Anthony WARURU<sup>1</sup>, Clement ZEH<sup>3</sup>, Mirjam E. KRETZSCHMAR<sup>4,5</sup>, Kevin M.  
DE COCK<sup>1</sup>

<sup>1</sup> Division of Global HIV & TB, U.S. Centers for Disease Control and Prevention,  
Nairobi, Kenya

<sup>2</sup> National AIDS & STI Control Programme, Ministry of Health, Kenya

<sup>3</sup> Division of Global HIV & TB, U.S. Centers for Disease Control and Prevention,  
Atlanta, GA, USA

<sup>4</sup> Julius Center for Health Sciences and Primary Care, University Medical Center  
Utrecht (UMCU), Utrecht, the Netherlands

<sup>5</sup> Centre for Infectious Disease Control, National Institute of Public Health and the  
Environment (RIVM), Bilthoven, The Netherlands

Abstract length: 227 words (limit 250)      Paper length: 1769 words (limit 1800)

<sup>§</sup> Corresponding author and requests for reprints: Peter Wesley Young

PO Box 606  
Village Market  
Nairobi, Kenya 00601  
Email: [Pyoung1@cdc.gov](mailto:Pyoung1@cdc.gov) phone: +254728608673

E-mail addresses of authors:  
PWY: [pyoung1@cdc.gov](mailto:pyoung1@cdc.gov)  
EZG: [ebz0@cdc.gov](mailto:ebz0@cdc.gov)  
JW: [jwamicwe@yahoo.co.uk](mailto:jwamicwe@yahoo.co.uk)  
IM: [irenemukui5@gmail.com](mailto:irenemukui5@gmail.com)  
AAK: [bwd2@cdc.gov](mailto:bwd2@cdc.gov)  
AW: [ivq3@cdc.gov](mailto:ivq3@cdc.gov)  
CZ: [cbz2@cdc.gov](mailto:cbz2@cdc.gov)  
MEK: [M.E.E.Kretzschmar@umcutrecht.nl](mailto:M.E.E.Kretzschmar@umcutrecht.nl)  
KDC: [kmd2@cdc.gov](mailto:kmd2@cdc.gov)

Conflicts of interest and source of funding:

The 2012 Kenya AIDS Indicator Survey has been supported by the President's Emergency Plan for AIDS Relief (PEPFAR) through the U.S. Centers for Disease Control and Prevention (CDC) under the terms of #PS001805, GH000069, and PS001814. The survey was also funded in part by support from the Global Fund, World Bank, and the Joint United Nations Programme on HIV/AIDS.

A portion of this analysis has been presented as a poster at the 2019 International AIDS Society (IAS) conference (<http://programme.ias2019.org/Abstract/Abstract/4626>).

**Disclaimer:** The findings and conclusions in this manuscript are those of the author(s) and do not necessarily represent the official position of the Centers for Disease Control and Prevention and other funding institutions.

The authors declare no conflicts of interest.

## Abstract

**Objective:** To compare alternative methods of adjusting self-reported knowledge of HIV-positive status and antiretroviral (ARV) therapy use based on undetectable viral load (UVL) and ARV detection in blood.

**Design:** *Post hoc* analysis of nationally-representative household survey to compare alternative biomarker-based adjustments to population HIV indicators.

**Methods:** We reclassified HIV-positive participants aged 15–64 years in the 2012 Kenya AIDS Indicator Survey (KAIS) that were unaware of their HIV-positive status by self-report as aware and on antiretroviral treatment if either ARVs were detected or viral load was undetectable (<550 copies/mL) on dried blood spots. We compared self-report to adjustments for ARVs measurement, UVL, or both.

**Results:** Treatment coverage among all HIV-positive respondents increased from 31.8% for self-report to 42.5% [95% confidence interval (CI) 37.4–47.8] based on ARV detection alone, to 42.8% (95% CI 37.9–47.8) when ARV-adjusted, 46.2% (95% CI 41.3–51.1) when

67 UVL-adjusted and 48.8% (95% CI 43.9–53.8) when adjusted for either ARV or UVL.  
 68 Awareness of positive status increased from 46.9% for self-report to 56.2% (95% CI 50.7–  
 69 61.6) when ARV-adjusted, 57.5% (95% CI 51.9–63.0) when UVL-adjusted, and 59.8% (95%  
 70 CI 54.2–65.1) when adjusted for either ARV or UVL.

71 **Conclusions:** Undetectable viral load, which is routinely measured in surveys, may be a  
 72 useful adjunct or alternative to ARV detection for adjusting survey estimates of  
 73 knowledge of HIV status and antiretroviral treatment coverage.

74

75 **Abstract length: 227 words**

76 Keywords: HIV surveillance, antiretroviral treatment, population surveys, biomarkers,  
 77 Kenya

78

## Introduction

Since the 2007 Kenya AIDS Indicator Survey (KAIS), HIV seroprevalence surveys have often included questions on knowledge of HIV status and antiretroviral (ARV) use among HIV-infected respondents, as well as biomarkers such as viral load (VL) [1–3] and ARV testing. Self-reported knowledge of status and antiretroviral treatment (ART) status can be subject to either positive or negative social desirability bias in some respondents [4] due to the stigma associated with HIV [5,6]. Some respondents may also have inaccurate recall or understanding of detailed questions about their HIV testing and care histories [7].

Antiretroviral testing can be used to adjust self-reported HIV status by reclassifying respondents with ARVs detected in their blood as being previously diagnosed and on ART [8,9]. In the 2012 KAIS 46.9% of HIV-infected respondents self-reported that they were aware of their HIV-positive status, but ARVs were also detected in 21.0% of those not reporting prior HIV diagnosis and 19.3% of those reporting no previous HIV test. However, antiretroviral testing is relatively complex, expensive, and only available within a very limited number of specialized laboratories worldwide, necessitating international shipping, resulting in additional cost, administrative paperwork, and potential for delays.

Unlike ARV testing, which is added exclusively to correct self-reported HIV status and ART use, viral load testing is widely available and routinely included in surveys to estimate population viral suppression (defined as VL < 1000 copies/mL [10]). Undetectable viral load (UVL) is generally indicative of viral suppression due to treatment, hence it could serve as an alternative, indirect marker for treatment. Although the presence of elite controllers (EC) who have UVL in the absence of treatment could confound use of UVL as a proxy for ART use, in US and European cohorts EC are believed to represent only 0.15–1.5% of the HIV-infected population [11], while in East African settings similarly low prevalence of EC has been observed [12,13], limiting the potential impact of this confounding.

Given viral load testing is already conducted routinely in HIV surveys, we examined whether adjusting estimates of knowledge of HIV-positive status and ART coverage using a measure of viral load would achieve similar results to adjustments based on detection of ARVs in a national household survey conducted in Kenya in 2012.

## Methods

The 2012 KAIS included behavioral questions including self-reported HIV and ART status as well as collection of venous blood from which DBS were prepared by field teams and plasma separated and shipped for HIV testing at a national laboratory [2]. After participating in other survey procedures, participants were offered rapid HIV testing by trained HIV counselors in their homes with immediate return of results based on national HIV testing guidelines [14]. Participants testing positive for HIV at the central laboratory were subsequently tested for viral load using the Abbott M2000 platform on DBS subsequently stored at -80°C for future testing. In 2015, DBS were shipped to the University of Cape Town for testing for presence of efavirenz, nevirapine, lopinavir or lamivudine by liquid chromatography tandem mass spectrometry (limit of detection 0.02 µg/mL) [15]. These ARVs were selected to cover first- and second-line regimens in use in Kenya at the time of specimen collection [8,16,17].

We retrospectively re-analyzed survey data to compare self-reported and biomarker-adjusted versions of knowledge of status and ART use among HIV-infected respondents aged 15-64 years.

## Measures

We defined UVL as having a viral load <550 copies/mL on dried blood spots, the limit of detection for the assay used in the study [18]. To calculate UVL-adjusted status, we updated the status for those respondents categorized as 'unaware' or 'aware, not on ART' with undetectable viral load to 'aware, on ART'. Similarly, ARV-adjusted status was calculated by updating the status for

respondents with ARVs detected in blood to ‘aware, on ART’. For either case, the status for respondents with missing biomarker results was not updated.

We explored differences in self-reported, ARV-adjusted, and UVL-adjusted indicators by age, sex, marital status, educational attainment and mobility. Results were analyzed in R version 3.5.0 [19] using the survey package [20] to adjust and weight results to account for the complex survey design. Wald confidence intervals for survey indicators were calculated on the logarithmic scale and transformed to probability scale using the ‘logit’ method of the svyprop function in R; confidence intervals previously reported by Kim et al. [21] were calculated on the probability scale.

## **Ethical considerations**

The 2012 KAIS was approved by the University of California, San Francisco, the U.S. Centers for Disease Control (CDC) in Atlanta, GA, USA and the Kenya Medical Research Institute. Prior to household and individual interviews and blood collection written consent was obtained; in the case of children aged less than 18 years assent was sought in addition to permission from their caregiver or guardian.

## **Results**

Among 648 HIV-infected respondents, self-reported status was ‘unaware’ among 343 (53.1%), ‘aware, not on ART’ among 100 (15.1%), and ‘aware, on ART’ among 205 (31.8%) (Supplemental Table S1). Of those with UVL and unaware of their HIV-positive status by self-report, 40 also had ARVs detected in blood (Supplemental Table S2). Antiretroviral treatment coverage among all HIV-infected increased from 31.8% (95% CI 27.3–36.6) based on self-report to 42.8% (95% CI 37.9–47.8) when combining self-report and ARV detection, to 46.2% (95% CI 41.3–51.1) when combining self-report and UVL, and finally to 48.8% (95% CI 43.9–53.8) with self-report, UVL or ARVs combined (Table 1). Changes in ART coverage were consistent across demographic

characteristics, although the 15–24 year age group saw greater increases when adjusted compared to other age groups (Supplemental Figure S1).

Knowledge of status increased from 46.9% (95% CI 41.4–52.4) based on self-report to 56.2% (95% CI 50.7–61.6) when adjusting with ARVs, to 57.5% (95% CI 51.9–63.0) when adjusting for UVL, and to 59.8% (95% CI 54.2–65.1) when adjusting for either ARV or UVL (Table 2). Similar to population ART coverage, ART among those with known HIV-positive status also increased from self-report to adjustment, with similar increases between adjustment methods. The youngest age group also saw the biggest impact of adjustment versus self-report for these indicators in both relative and absolute terms.

We repeated the analysis excluding the respondents for whom either the ARV or UVL biomarkers were not available; findings were similar (Supplemental Table S3).

## Discussion

In order to balance resources between finding undiagnosed HIV infections, linking patients to HIV treatment, and ensuring retention and adherence to care it is necessary to obtain the best possible estimates of knowledge of HIV-positive status and ART use. We set out to establish whether viral load, a routinely-available marker in HIV surveys, can be used to adjust self-reported estimates of knowledge of HIV-positive status and ART use. In KAIS 2012, UVL-adjusted point estimates were similar to, but slightly greater than ARV-adjusted estimates of knowledge of status and ART coverage, suggesting adjustment with UVL might have been sufficient. When measuring ART coverage, all of the adjusted estimates (ARV only, UVL only, and either ARV or UVL) had overlapping confidence intervals, but are notably higher than estimates based on self-report alone.

The change in estimates when adjusting by ARVs and UVL were similar across demographic groups, but 15–24 year olds did see a larger additional increase when adjusting by UVL. This may

indicate poor recent adherence in this group leading to non-detection of the ARV biomarker but undetectable viral load (<550 copies/mL in this study). Li et al found that 37% of patients still had a viral load <200 copies/mL four weeks after interrupting ART [22]. Many ARVs reach undetectable levels in blood within several days of treatment interruption [8,15,23], thus in populations with poor adherence or high rates of treatment interruption, adjusting based on UVL may result in higher estimated ART coverage than measures incorporating ARV detection.

The performance of UVL for adjusting ART use will depend on the prevalence of UVL in the population on HIV treatment. In populations with effective ART programs with high rates of viral suppression in the treated population, it may be a relatively sensitive marker for ART use; however, in populations with poor treatment outcomes a larger proportion of patients on treatment would not have UVL.

The prevalence of elite controllers has not been established in Kenya, hence it is not possible to quantify their influence on the UVL-adjusted estimates, but given the similarity between UVL-adjusted and ARV-adjusted estimates, their potential impact was limited. Simultaneously adjusting for either UVL or presence of ARVs may in fact be closest to true population prevalence of the indicators of interest. Without better data on prevalence of elite controllers in this population it is more conservative to use one or the other marker rather than both combined. In settings with ample evidence of low prevalence of elite control, or where population high ART coverage and immediate treatment initiation means even elite controllers are likely to be on treatment, using the combined indicator would likely represent the most sensitive approach to estimating population-based knowledge of status and ART coverage.

This analysis was subject to several limitations. While adjusting for biomarkers associated with ARV exposure from a single time-point can account for misreporting of status among those on ART, it cannot account for those who misreport their knowledge of HIV-positive status but are not currently on treatment, or those who may be on treatment but transiently non-adherent to



medications. Other established methods for reducing bias in self-reported estimates, such as computer-assisted self-interview methods, may also be helpful [24]. This analysis was based on data from a single country with low ART coverage (43.5%) and viral suppression among those on treatment (73.9%) at the time of the survey compared with current program coverage; the UVL adjustment may perform differently in other populations. Simulation or replication of this analysis in a diverse set of populations, including the more recent population-based HIV impact assessments conducted in many countries, could help elucidate the performance of UVL adjustment in different settings. Finally, poor specimen quality could result in false-negative results for both biomarkers. In spite of these limitations, this analysis does strongly suggest that use of UVL to adjust self-reported HIV status and ART use should be considered, especially in surveys where the inclusion of the ARV biomarker may be cost-prohibitive or subject to delays.

## Conclusion

Streamlining the estimation of key HIV program indicators should allow governments, donors and other stakeholders to assess program performance more quickly and affordably. Viral load, which is routinely measured in HIV surveys, may be a useful biomarker for adjusting self-reported indicators of HIV diagnosis and treatment in cross-sectional surveys in absence of, or in addition to, adjustment based on detected ARVs in blood.

## Acknowledgements

We would like to thank the University of Cape Town Department of Clinical Pharmacology for conducting the ART biomarker testing, the National HIV Reference Laboratory for conducting the KAIS 2012 viral load testing, the study teams that collected data in the field, and finally the survey participants.

## Competing interests

All authors declare no competing interests.

## Authors' contributions

PWY, EZG and KDC conceived the study. PWY conducted the analyses. All authors contributed to drafting and critical review of the manuscript.

## Additional files

Additional file 1. Supplementary tables and figures

Word document containing additional supplementary analyses referenced in text.

## References

- 1 2007 Kenya AIDS Indicator Survey Final Report. Nairobi, Kenya: National AIDS and STI Control Programme (NASCOP); 2009. <http://stacks.cdc.gov/view/cdc/12122/>
- 2 Waruiru W, Kim AA, Kimanga DO, Ng'ang'a J, Schwarcz S, Kimondo L, *et al.* The Kenya AIDS Indicator Survey 2012: rationale, methods, description of participants, and response rates. *J Acquir Immune Defic Syndr* 2014; **66 Suppl 1**:S3-12.
- 3 Brown K, Williams DB, Kinchen S, Saito S, Radin E, Patel H, *et al.* Status of HIV Epidemic

- 239 Control Among Adolescent Girls and Young Women Aged 15–24 Years — Seven African  
240 Countries, 2015–2017. *MMWR. Morb. Mortal. Wkly. Rep.* 2018.  
241 doi:10.15585/mmwr.mm6701a6
- 242 4 Kelly CA, Hewett PC, Mensch BS, Rankin JC, Nsobya SL, Kalibala S, *et al.* Using biomarkers  
243 to assess the validity of sexual behavior reporting across interview modes among young  
244 women in Kampala, Uganda. *Stud Fam Plann* Published Online First: 2014.  
245 doi:10.1111/j.1728-4465.2014.00375.x
- 246 5 Bonnington O, Wamoyi J, Ddaaki W, Bukonya D, Ondenge K, Skovdal M, *et al.* Changing  
247 forms of HIV-related stigma along the HIV care and treatment continuum in sub-Saharan  
248 Africa: A temporal analysis. *Sex Transm Infect* 2017; **93**:1–6.
- 249 6 Gurmu E, Etana D. HIV/AIDS knowledge and stigma among women of reproductive age in  
250 Ethiopia. *African J AIDS Res* 2015; **14**:191–199.
- 251 7 Mooney AC, Campbell CK, Ratlhagana M-J, Grignon JS, Mazibuko S, Agnew E, *et al.* Beyond  
252 Social Desirability Bias: Investigating Inconsistencies in Self-Reported HIV Testing and  
253 Treatment Behaviors Among HIV-Positive Adults in North West Province, South Africa.  
254 *AIDS Behav* 2018; **22**:2368–2379.
- 255 8 Kim AA, Mukui I, Young PW, Mirjahangir J, Mwanyumba S, Wamicwe J, *et al.* Undisclosed  
256 HIV infection and ART use in the Kenya AIDS indicator survey 2012: relevance to targets for  
257 HIV diagnosis and treatment in Kenya. *AIDS* 2016; **30**:2685–2695.
- 258 9 Huerga H, Shiferie F, Grebe E, Giuliani R, Farhat J Ben, Van-Cutsem G, *et al.* A comparison  
259 of self-report and antiretroviral detection to inform estimates of antiretroviral therapy  
260 coverage, viral load suppression and HIV incidence in Kwazulu-Natal, South Africa. *BMC*  
261 *Infect Dis* 2017; **17**:1–8.

- 262 10 Global AIDS Monitoring 2018: Indicators for monitoring the 2016 United Nations Political  
263 Declaration on Ending AIDS. Geneva, Switzerland: UNAIDS; 2017.  
264 [https://www.unaids.org/sites/default/files/media\\_asset/2017-Global-AIDS-](https://www.unaids.org/sites/default/files/media_asset/2017-Global-AIDS-Monitoring_en.pdf)  
265 [Monitoring\\_en.pdf](https://www.unaids.org/sites/default/files/media_asset/2017-Global-AIDS-Monitoring_en.pdf)
- 266 11 Gonzalo-Gil E, Ikediobi U, Sutton RE. Mechanisms of virologic control and clinical  
267 characteristics of HIV+ elite/viremic controllers. *Yale J Biol Med* 2017; **90**:245–259.
- 268 12 Kayongo A, Gonzalo-Gil E, Gümüsgöz E, Niwaha AJ, Semitala F, Kalyesubula R, *et al.*  
269 Identification of Elite and Viremic Controllers from a Large Urban HIV Ambulatory Center in  
270 Kampala, Uganda. *JAIDS J Acquir Immune Defic Syndr* 2018; **79**:394–398.
- 271 13 Kiros Y, Elinav H, Gebreyesus A, Gebremeskel H, Azar J, Chemtob D, *et al.* Identification and  
272 characterization of HIV positive Ethiopian elite controllers in both Africa and Israel. *HIV*  
273 *Med* 2018; :1–5.
- 274 14 National Guidelines for HIV Testing and Counseling in Kenya. 2nd ed. Nairobi, Kenya:  
275 National AIDS and STI Control Programme (NASCOP); 2010.
- 276 15 Koal T, Burhenne H, Römling R, Svoboda M, Resch K, Kaever V. Quantification of  
277 antiretroviral drugs in dried blood spot samples by means of liquid  
278 chromatography/tandem mass spectrometry. *Rapid Commun Mass Spectrom* 2005;  
279 **19**:2995–3001.
- 280 16 Moyo S, Young PW, Gouws E, Naidoo I, Wamicwe J, Mukui I, *et al.* Equity of antiretroviral  
281 treatment use in high HIV burden countries: Analyses of data from nationally-  
282 representative surveys in Kenya and South Africa. *PLoS One* 2018; **13**:1–17.
- 283 17 Guidelines for antiretroviral therapy in Kenya, 4th Edition 2011. Kenya: National AIDS and  
284 STI Control Programme (NASCOP); 2011. <http://www.emtct-iatt.org/wp->

285 content/uploads/2013/04/Kenya\_National-ARV-Guidelines\_2011.pdf

286 18 Zeh C, Ndiege K, Inzaule S, Achieng R, Williamson J, Chang JCW, *et al.* Evaluation of the  
287 performance of Abbott m2000 and Roche COBAS Ampliprep/COBAS Taqman assays for  
288 HIV-1 viral load determination using dried blood spots and dried plasma spots in Kenya.  
289 *PLoS One* Published Online First: 2017. doi:10.1371/journal.pone.0179316

290 19 R Core Team. R: A Language and Environment for Statistical Computing.  
291 2018.<https://www.r-project.org/>

292 20 Lumley T. survey: analysis of complex survey samples. 2017.

293 21 Kim AA, Mukui I, Young PW, Mirjahangir J, Mwanyumba S, Wamicwe J, *et al.* Undisclosed  
294 HIV infection and antiretroviral therapy use in the Kenya AIDS indicator survey 2012:  
295 Relevance to national targets for HIV diagnosis and treatment. *AIDS* 2016; **30**.  
296 doi:10.1097/QAD.0000000000001227

297 22 Li JZ, Etemad B, Ahmed H, Aga E, Bosch RJ, Mellors JW, *et al.* The size of the expressed HIV  
298 reservoir predicts timing of viral rebound after treatment interruption. *AIDS* 2016; **30**:343–  
299 353.

300 23 Jackson A, Moyle G, Watson V, Tjia J, Ammara A, Back D, *et al.* Tenofovir, emtricitabine  
301 intracellular and plasma, and efavirenz plasma concentration decay following drug intake  
302 cessation: Implications for HIV treatment and prevention. *J Acquir Immune Defic Syndr*  
303 Published Online First: 2013. doi:10.1097/QAI.0b013e3182829bd0

304 24 Gnambs T, Kaspar K. Disclosure of sensitive behaviors across self-administered survey  
305 modes: a meta-analysis. *Behav Res Methods* Published Online First: 2014.  
306 doi:10.3758/s13428-014-0533-4

307

308 **Table 1.** Self-reported and adjusted estimates of ART coverage among people living with HIV, KAIS 2012

| Characteristic        | Self-reported |      |     | ARV only |      |     | Self-report or ARV |      |     | Self-report or UVL (N=648) |      |     | Self-reported, ARV or UVL (N=648) |      |     |
|-----------------------|---------------|------|-----|----------|------|-----|--------------------|------|-----|----------------------------|------|-----|-----------------------------------|------|-----|
|                       | (N=648)       |      |     | (N=559)  |      |     | (N=648)            |      |     | UVL (N=648)                |      |     | (N=648)                           |      |     |
|                       | n             | %    | se  | n        | %    | se  | n                  | %    | se  | n                          | %    | se  | n                                 | %    | se  |
| <b>Sex</b>            |               |      |     |          |      |     |                    |      |     |                            |      |     |                                   |      |     |
| Male                  | 51            | 27.0 | 3.7 | 64       | 37.8 | 4.7 | 74                 | 39.9 | 4.5 | 78                         | 41.9 | 4.4 | 84                                | 44.3 | 4.5 |
| Female                | 154           | 34.7 | 2.5 | 171      | 45.6 | 2.6 | 198                | 44.6 | 2.5 | 217                        | 48.8 | 2.5 | 230                               | 51.6 | 2.5 |
| <b>Age group</b>      |               |      |     |          |      |     |                    |      |     |                            |      |     |                                   |      |     |
| 15–24 yrs             | 6             | 7.1  | 2.7 | 11       | 21.6 | 6.4 | 14                 | 20.7 | 5.8 | 19                         | 28.8 | 6.2 | 20                                | 29.9 | 6.2 |
| 25–34 yrs             | 48            | 21.1 | 3.1 | 50       | 25.1 | 3.6 | 65                 | 29.3 | 3.5 | 65                         | 28.2 | 3.3 | 76                                | 33.9 | 3.6 |
| 35–49 yrs             | 104           | 41.1 | 3.9 | 121      | 55.0 | 3.8 | 133                | 52.9 | 3.6 | 147                        | 58.2 | 3.4 | 152                               | 59.5 | 3.3 |
| 50–64 yrs             | 47            | 48.0 | 5.4 | 53       | 59.6 | 5.6 | 60                 | 60.6 | 5.3 | 64                         | 64.0 | 5.0 | 66                                | 65.5 | 5.0 |
| <b>Marital status</b> |               |      |     |          |      |     |                    |      |     |                            |      |     |                                   |      |     |
| Single/never married  | 16            | 16.7 | 4.0 | 18       | 24.5 | 5.9 | 22                 | 23.8 | 5.1 | 29                         | 32.5 | 5.6 | 31                                | 33.9 | 5.7 |

|                                       |     |      |      |     |      |      |     |      |     |     |      |     |     |      |     |
|---------------------------------------|-----|------|------|-----|------|------|-----|------|-----|-----|------|-----|-----|------|-----|
| Married/cohabitating                  | 118 | 31.4 | 3.2  | 141 | 42.0 | 3.4  | 163 | 43.3 | 3.2 | 175 | 46.1 | 3.1 | 186 | 48.6 | 3.2 |
| Divorced /sep /<br>widowed            | 71  | 41.5 | 4.0  | 76  | 53.1 | 4.3  | 87  | 52.6 | 4.0 | 91  | 54.2 | 3.9 | 97  | 58.1 | 4.0 |
| <b>Highest educational attainment</b> |     |      |      |     |      |      |     |      |     |     |      |     |     |      |     |
| None                                  | 28  | 33.2 | 5.8  | 31  | 35.5 | 5.9  | 39  | 44.6 | 6.0 | 39  | 45.2 | 6.0 | 41  | 46.5 | 6.0 |
| Primary                               | 94  | 26.7 | 2.8  | 111 | 39.5 | 3.6  | 126 | 38.4 | 3.3 | 137 | 40.8 | 3.3 | 148 | 44.3 | 3.5 |
| Secondary                             | 10  | 31.4 | 10.2 | 14  | 45.7 | 10.1 | 15  | 43.7 | 9.8 | 16  | 50.7 | 9.3 | 18  | 54.9 | 9.6 |
| Higher                                | 73  | 40.8 | 4.3  | 78  | 50.6 | 5.0  | 91  | 50.2 | 4.4 | 102 | 55.8 | 4.2 | 106 | 57.2 | 4.1 |
| <b>Employment</b>                     |     |      |      |     |      |      |     |      |     |     |      |     |     |      |     |
| unemployed                            | 82  | 36.2 | 4.3  | 91  | 50.0 | 4.6  | 106 | 47.6 | 4.3 | 114 | 50.6 | 4.3 | 118 | 52.2 | 4.2 |
| employed                              | 123 | 29.6 | 2.6  | 144 | 39.0 | 2.8  | 166 | 40.5 | 2.8 | 181 | 44.0 | 2.7 | 196 | 47.2 | 2.8 |
| <b>Mobility</b>                       |     |      |      |     |      |      |     |      |     |     |      |     |     |      |     |
| Not away for >1<br>month in last year | 112 | 31.2 | 3.0  | 126 | 42.0 | 3.5  | 146 | 42.2 | 3.2 | 156 | 44.5 | 3.3 | 166 | 46.8 | 3.2 |

|                            |     |      |     |     |      |     |     |      |     |     |      |     |     |      |     |
|----------------------------|-----|------|-----|-----|------|-----|-----|------|-----|-----|------|-----|-----|------|-----|
| Away >1 month in last year | 87  | 32.1 | 3.4 | 101 | 43.7 | 4.0 | 117 | 43.7 | 3.6 | 129 | 48.0 | 3.7 | 137 | 51.4 | 3.9 |
| <b>Total</b>               | 205 | 31.8 | 2.4 | 235 | 42.5 | 2.6 | 272 | 42.8 | 2.5 | 295 | 46.2 | 2.5 | 314 | 48.8 | 2.5 |

---

Note: self-reported: self-report only, ARV-only: based on presence/absence of ARVs only, self-report or ARV: either self-reported known-positive/on ART or ARVs detected, self-report or UVL: either self-reported known-positive/on ART or viral load was undetectable, self-report, ARV or UVL: either self-reported known-positive/on ART, ARVs detected, or UVL, N: unweighted denominator, n: unweighted numerator, se: standard error. Missing biomarker results were treated as biomarker not present. Percentages and standard errors are weighted and adjusted to account for the survey design.



314 **Table 2.** Self-reported and adjusted estimates of HIV care cascade, KAIS 2012

| Characteristic                                          |           | Self-report |      |     | Self-report or ARV |      |     | Self-report or UVL |      |     | Self-report, ARV or UVL |      |     |
|---------------------------------------------------------|-----------|-------------|------|-----|--------------------|------|-----|--------------------|------|-----|-------------------------|------|-----|
| Variable                                                | Level     | n           | %    | se  | n                  | %    | se  | n                  | %    | se  | n                       | %    | se  |
| <b>Awareness of HIV infection (1st 90)</b>              |           |             |      |     |                    |      |     |                    |      |     |                         |      |     |
| Gender                                                  | Male      | 73          | 38.0 | 4.3 | 92                 | 49.5 | 4.9 | 95                 | 50.7 | 4.9 | 99                      | 52.6 | 5.0 |
|                                                         | Female    | 232         | 52.2 | 2.8 | 268                | 60.4 | 2.6 | 275                | 61.7 | 2.5 | 286                     | 64.2 | 2.5 |
| Age group                                               | 15–24 yrs | 16          | 18.0 | 5.0 | 24                 | 31.7 | 6.5 | 27                 | 37.7 | 7.0 | 28                      | 38.8 | 7.0 |
|                                                         | 25–34 yrs | 88          | 41.1 | 4.3 | 102                | 48.2 | 4.3 | 102                | 46.7 | 4.3 | 111                     | 52.0 | 4.3 |
|                                                         | 35–49 yrs | 144         | 55.9 | 3.8 | 167                | 65.7 | 3.4 | 172                | 67.6 | 3.3 | 176                     | 68.5 | 3.3 |
|                                                         | 50–64 yrs | 57          | 56.9 | 5.5 | 67                 | 66.4 | 5.2 | 69                 | 68.0 | 5.0 | 70                      | 68.7 | 5.0 |
| Total                                                   |           | 305         | 46.9 | 2.8 | 360                | 56.2 | 2.8 | 370                | 57.5 | 2.8 | 385                     | 59.8 | 2.8 |
| <b>ART coverage among previously-diagnosed (2nd 90)</b> |           |             |      |     |                    |      |     |                    |      |     |                         |      |     |
| Gender                                                  | Male      | 51          | 71.0 | 5.8 | 74                 | 80.7 | 4.5 | 78                 | 82.5 | 4.0 | 84                      | 84.2 | 3.9 |
|                                                         | Female    | 154         | 66.4 | 3.3 | 198                | 73.9 | 3.0 | 217                | 79.1 | 2.7 | 230                     | 80.4 | 2.6 |

|                                                                   |           |     |      |      |     |      |      |     |      |     |     |      |     |
|-------------------------------------------------------------------|-----------|-----|------|------|-----|------|------|-----|------|-----|-----|------|-----|
| Age group                                                         | 15–24 yrs | 6   | 39.3 | 10.4 | 14  | 65.5 | 10.0 | 19  | 76.3 | 7.3 | 20  | 77.0 | 7.1 |
|                                                                   | 25–34 yrs | 48  | 51.2 | 5.8  | 65  | 60.9 | 5.3  | 65  | 60.3 | 5.3 | 76  | 65.2 | 5.1 |
|                                                                   | 35–49 yrs | 104 | 73.6 | 4.4  | 133 | 80.5 | 3.7  | 147 | 86.2 | 2.7 | 152 | 86.8 | 2.6 |
|                                                                   | 50–64 yrs | 47  | 84.3 | 5.2  | 60  | 91.3 | 3.8  | 64  | 94.1 | 2.7 | 66  | 95.5 | 2.3 |
| Total                                                             |           | 205 | 67.9 | 3.2  | 272 | 76.2 | 2.8  | 295 | 80.2 | 2.3 | 314 | 81.7 | 2.3 |
| <b>Viral load &lt; 1000 copies/mL among those on ART (3rd 90)</b> |           |     |      |      |     |      |      |     |      |     |     |      |     |
| Gender                                                            | Male      | 35  | 72.8 | 6.3  | 52  | 75.9 | 5.1  | 62  | 82.5 | 4.3 | 62  | 78.4 | 4.6 |
|                                                                   | Female    | 115 | 76.6 | 3.8  | 146 | 75.4 | 3.5  | 178 | 83.5 | 2.8 | 178 | 78.8 | 2.9 |
| Age group                                                         | 15–24 yrs | 2   | 34.6 | 19.8 | 9   | 72.4 | 11.3 | 15  | 83.9 | 7.4 | 15  | 80.8 | 7.9 |
|                                                                   | 25–34 yrs | 29  | 57.3 | 8.2  | 35  | 50.0 | 7.3  | 46  | 68.4 | 6.7 | 46  | 57.0 | 6.6 |
|                                                                   | 35–49 yrs | 84  | 84.5 | 3.8  | 108 | 85.6 | 3.3  | 127 | 89.1 | 2.7 | 127 | 87.2 | 2.9 |
|                                                                   | 50–64 yrs | 35  | 74.9 | 6.6  | 46  | 77.5 | 5.7  | 52  | 81.2 | 5.2 | 52  | 79.2 | 5.3 |
| Total                                                             |           | 150 | 75.4 | 3.3  | 198 | 75.6 | 2.8  | 240 | 83.1 | 2.3 | 240 | 78.6 | 2.5 |

Note: self-reported: self-report only, self-report or ARV: either self-reported known-positive/on ART or ARVs detected, self-report or UVL:

either self-reported known-positive/on ART or viral load was undetectable, self-report, ARV or UVL: either self-reported known-

317 positive/on ART, ARVs detected, or UVL, n: unweighted numerator, se: standard error, viral suppression defined as <1000 copies/mL.  
 318 Missing biomarker results were treated as biomarker not present. Percentages and standard errors are weighted and adjusted to account  
 319 for the survey design. The unweighted denominators can vary due to adjustment for the 2<sup>nd</sup> and 3<sup>rd</sup> 90 and for each indicator/measure  
 320 combination are as follows: 1<sup>st</sup> 90: 305 for all measures, 2<sup>nd</sup> 90: 360 for self-report or ARV, 370 for self-report or UVL, 385 for self-report,  
 321 ARV or UVL, 3<sup>rd</sup> 90: 200 for self-reported, 266 for self-reported or ARV, 308 for self-report, ARV or UVL.
